# Supplementary material for: Biophenolic Profile Modulations in Olive Tissues as Affected by Manganese Nutrition
Source: MDPI journal article supplement (doi:10.3390/plants10081724), 2021-08-20
Supplement: s1 [file s1]

**Table S1.** Concentration of simple biophenols, phenolic acids, flavonoids and total biophenols in leaves of 'Istarska bjelica' olive cv. treated with three different manganese (Mn) concentrations.

| Source of variation | Simple biophenols |                  |                 | Phenolic acid   | Flavonoids       |                               |                              |                        |                  | Total biophenols     |
|---------------------|-------------------|------------------|-----------------|-----------------|------------------|-------------------------------|------------------------------|------------------------|------------------|----------------------|
|                     | Hydroxy-tyrosol   | Tyrosol          | Vanillin        | Vanillic acid   | Catechin         | Luteolin                      | Apigenin                     | Apigenin-7-O-glucoside | Rutin            |                      |
| (mg/100 g DW)       |                   |                  |                 |                 |                  |                               |                              |                        |                  |                      |
| <b>Treatment</b>    |                   |                  |                 |                 |                  |                               |                              |                        |                  |                      |
| 0.2 $\mu$ M Mn      | 35.29 $\pm$ 2.83  | 27.32 $\pm$ 4.47 | 0.52 $\pm$ 0.07 | 1.42 $\pm$ 0.14 | 26.76 $\pm$ 1.55 | 32.45 $\pm$ 3.31 <sup>a</sup> | 2.94 $\pm$ 0.17 <sup>a</sup> | 10.23 $\pm$ 1.50       | 52.73 $\pm$ 5.73 | 5150.56 $\pm$ 162.66 |
| 12 $\mu$ M Mn       | 34.00 $\pm$ 1.61  | 26.75 $\pm$ 2.44 | 0.63 $\pm$ 0.02 | 1.43 $\pm$ 0.19 | 26.85 $\pm$ 0.97 | 24.38 $\pm$ 3.86 <sup>a</sup> | 2.75 $\pm$ 0.31 <sup>a</sup> | 11.70 $\pm$ 0.29       | 56.25 $\pm$ 7.02 | 5537.62 $\pm$ 228.43 |
| 24 $\mu$ M Mn       | 38.69 $\pm$ 3.18  | 25.4 $\pm$ 3.06  | 0.56 $\pm$ 0.00 | 1.09 $\pm$ 0.28 | 28.07 $\pm$ 0.65 | 13.31 $\pm$ 1.35 <sup>b</sup> | 1.57 $\pm$ 0.14 <sup>b</sup> | 10.64 $\pm$ 0.57       | 67.88 $\pm$ 4.97 | 6095.81 $\pm$ 194.72 |
| <b>p-value</b>      | n.s.              | n.s.             | n.s.            | n.s.            | n.s.             | **                            | *                            | n.s.                   | n.s.             | n.s.                 |

Results are expressed as means  $\pm$  standard errors (n=4). Different superscript lowercase letters in the column represent statistically significant differences between mean values for each main effect at  $p < 0.05$  obtained by ANOVA main effects and Tukey's test. Significance: \*\*\*— $p < 0.001$ . \*\*— $p < 0.01$ . \*— $p < 0.05$ . DW — dry weight.

**Table S2.** Concentration of simple biophenols, phenolic acids, flavonoids, and total biophenols in stems of 'Istarska bjelica' olive cv. treated with three different manganese (Mn) concentrations.

| Source of variation | Simple biophenols             |                  |                              | Phenolic acids                 |                              | Flavonoids      |                              |                               | Total biophenols    |
|---------------------|-------------------------------|------------------|------------------------------|--------------------------------|------------------------------|-----------------|------------------------------|-------------------------------|---------------------|
|                     | Hydroxytyrosol                | Tyrosol          | Vanillin                     | Vanillic acid                  | Caffeic acid                 | Luteolin        | Apigenin                     | Rutin                         |                     |
| (mg/100 g DW)       |                               |                  |                              |                                |                              |                 |                              |                               |                     |
| <b>Treatment</b>    |                               |                  |                              |                                |                              |                 |                              |                               |                     |
| 0.2 $\mu$ M Mn      | 16.93 $\pm$ 0.4 <sup>b</sup>  | 9.93 $\pm$ 0.85  | 1.54 $\pm$ 0.05 <sup>b</sup> | 9.48 $\pm$ 0.8 <sup>b</sup>    | 2.35 $\pm$ 0.17 <sup>b</sup> | 3.38 $\pm$ 0.27 | 1.69 $\pm$ 0.17 <sup>b</sup> | 7.57 $\pm$ 1.15 <sup>b</sup>  | 1434.37 $\pm$ 82.13 |
| 12 $\mu$ M Mn       | 17.91 $\pm$ 1.15 <sup>b</sup> | 11.42 $\pm$ 0.42 | 1.68 $\pm$ 0.11 <sup>b</sup> | 11.31 $\pm$ 1.17 <sup>ab</sup> | 2.66 $\pm$ 0.13 <sup>b</sup> | 3.36 $\pm$ 0.21 | 1.78 $\pm$ 0.14 <sup>b</sup> | 9.81 $\pm$ 0.91 <sup>b</sup>  | 1677.80 $\pm$ 89.36 |
| 24 $\mu$ M Mn       | 23.56 $\pm$ 0.68 <sup>a</sup> | 16.49 $\pm$ 2.56 | 2.23 $\pm$ 0.06 <sup>a</sup> | 14.82 $\pm$ 0.89 <sup>a</sup>  | 3.93 $\pm$ 0.37 <sup>a</sup> | 3.92 $\pm$ 0.05 | 2.43 $\pm$ 0.24 <sup>a</sup> | 14.11 $\pm$ 0.31 <sup>a</sup> | 2241.52 $\pm$ 55.30 |
| <b>p-value</b>      | **                            | n.s.             | **                           | *                              | *                            | n.s.            | *                            | **                            | n.s.                |

Results are expressed as means  $\pm$  standard errors (n=4). Different superscript lowercase letters in the column represent statistically significant differences between mean values for each main effect at  $p < 0.05$  obtained by ANOVA main effects and Tukey's test. Significance: \*\*\*— $p < 0.001$ . \*\*— $p < 0.01$ . \*— $p < 0.05$ . DW — dry weight.

**Table S3.** Concentration of simple biophenols, phenolic acids, flavonoids, and total biophenols in roots of 'Istarska bjelica' olive cv. treated with three different manganese (Mn) concentrations.

| Source of variation   | Simple biophenols |                               |                 | Phenolic acids  |                              | Flavonoids                      | Total biophenols     |
|-----------------------|-------------------|-------------------------------|-----------------|-----------------|------------------------------|---------------------------------|----------------------|
|                       | Hydroxytyrosol    | Tyrosol                       | Vanillin        | Vanillic acid   | Caffeic acid                 | Apigenin-7- <i>O</i> -glucoside |                      |
|                       | (mg/100 g DW)     |                               |                 |                 |                              |                                 |                      |
| <b>Treatment</b>      |                   |                               |                 |                 |                              |                                 |                      |
| 0.2 $\mu$ M Mn        | 5.73 $\pm$ 0.57   | 16.81 $\pm$ 1.24 <sup>a</sup> | 9.57 $\pm$ 1.24 | 7.32 $\pm$ 0.43 | 0.46 $\pm$ 0.06 <sup>a</sup> | 0.70 $\pm$ 0.08 <sup>b</sup>    | 2226.68 $\pm$ 282.20 |
| 12 $\mu$ M Mn         | 4.78 $\pm$ 0.86   | 13.33 $\pm$ 1.76 <sup>b</sup> | 8.20 $\pm$ 1.91 | 7.01 $\pm$ 0.47 | 0.25 $\pm$ 0.03 <sup>b</sup> | 1.07 $\pm$ 0.31 <sup>ab</sup>   | 1573.05 $\pm$ 266.61 |
| 24 $\mu$ M Mn         | 5.17 $\pm$ 0.56   | 13.07 $\pm$ 0.62 <sup>b</sup> | 6.89 $\pm$ 1.41 | 6.92 $\pm$ 0.11 | 0.21 $\pm$ 0.03 <sup>b</sup> | 1.63 $\pm$ 0.13 <sup>a</sup>    | 1556.50 $\pm$ 171.35 |
| <b><i>p</i>-value</b> | <b>n.s.</b>       | <b>*</b>                      | <b>n.s.</b>     | <b>n.s.</b>     | <b>**</b>                    | <b>*</b>                        | <b>n.s.</b>          |

Results are expressed as means  $\pm$  standard errors (n=4). Different superscript lowercase letters in a column represent statistically significant differences between mean values for each main effect at  $p < 0.05$  obtained by ANOVA main effects and Tukey's test. Significance: \*\*\*— $p < 0.001$ . \*\*— $p < 0.01$ . \*— $p < 0.05$ . DW — dry weight.

**Table S4.** The number of nodes and leaves, the plant height, the root, stem, and leaves DW of 'Istarska bjelica' olive cv. treated with three different manganese (Mn) concentrations.

| Source of variation   | Number of nodes  | Number of leaves | Plant height (cm) | Root DW (g/plant) | Leaves DW (g/plant) | Stem DW (g/plant) |
|-----------------------|------------------|------------------|-------------------|-------------------|---------------------|-------------------|
| <b>Treatment</b>      |                  |                  |                   |                   |                     |                   |
| 0.2 $\mu$ M Mn        | 20.00 $\pm$ 0.91 | 38.75 $\pm$ 1.38 | 67.68 $\pm$ 5.30  | 2.58 $\pm$ 0.20   | 8.40 $\pm$ 0.73     | 6.99 $\pm$ 0.67   |
| 12 $\mu$ M Mn         | 21.00 $\pm$ 1.58 | 40.00 $\pm$ 4.81 | 73.20 $\pm$ 11.41 | 2.56 $\pm$ 0.05   | 9.11 $\pm$ 0.21     | 7.62 $\pm$ 0.20   |
| 24 $\mu$ M Mn         | 19.50 $\pm$ 0.50 | 38.75 $\pm$ 1.25 | 70.25 $\pm$ 8.92  | 2.18 $\pm$ 0.10   | 7.79 $\pm$ 0.58     | 7.86 $\pm$ 0.36   |
| <b><i>p</i>-value</b> | <b>n.s.</b>      | <b>n.s.</b>      | <b>n.s.</b>       | <b>n.s.</b>       | <b>n.s.</b>         | <b>n.s.</b>       |

Results are expressed as means  $\pm$  standard errors (n=4). Different superscript lowercase letters in a column represent statistically significant differences between mean values for each main effect at  $p < 0.05$  obtained by ANOVA main effects and Tukey's test. Significance: \*\*\*— $p < 0.001$ , \*\*— $p < 0.01$ , \*— $p < 0.05$ . DW—dry weight.

**Table S5.** The total per plant quantity of simple biophenols, phenolic acids and flavonoids of 'Istarska bjelica' olive cv. treated with three different manganese (Mn) concentrations.

| Source of variation   | Simple biophenols |                 |                 | Phenolic acids  |                              | Flavonoids      |                 |                 |                        |                 |
|-----------------------|-------------------|-----------------|-----------------|-----------------|------------------------------|-----------------|-----------------|-----------------|------------------------|-----------------|
|                       | Hydroxytyrosol    | Tyrosol         | Vanillin        | Vanillic acid   | Caffeic acid                 | Catechin        | Luteolin        | Apigenin        | Apigenin-7-O-glucoside | Rutin           |
| (mg/plant)            |                   |                 |                 |                 |                              |                 |                 |                 |                        |                 |
| <b>Treatment</b>      |                   |                 |                 |                 |                              |                 |                 |                 |                        |                 |
| 0.2 $\mu$ M Mn        | 4.01 $\pm$ 0.36   | 3.20 $\pm$ 0.56 | 0.41 $\pm$ 0.06 | 1.08 $\pm$ 0.09 | 0.26 $\pm$ 0.01 <sup>b</sup> | 1.94 $\pm$ 0.16 | 2.62 $\pm$ 0.44 | 0.36 $\pm$ 0.01 | 0.81 $\pm$ 0.15        | 4.25 $\pm$ 0.34 |
| 12 $\mu$ M Mn         | 4.33 $\pm$ 0.09   | 3.41 $\pm$ 0.13 | 0.41 $\pm$ 0.05 | 1.31 $\pm$ 0.08 | 0.31 $\pm$ 0.01 <sup>b</sup> | 2.13 $\pm$ 0.06 | 2.19 $\pm$ 0.31 | 0.39 $\pm$ 0.02 | 0.99 $\pm$ 0.05        | 5.20 $\pm$ 0.55 |
| 24 $\mu$ M Mn         | 4.96 $\pm$ 0.20   | 3.59 $\pm$ 0.50 | 0.36 $\pm$ 0.03 | 1.38 $\pm$ 0.07 | 0.37 $\pm$ 0.02 <sup>a</sup> | 2.28 $\pm$ 0.06 | 1.38 $\pm$ 0.17 | 0.33 $\pm$ 0.03 | 0.94 $\pm$ 0.09        | 6.42 $\pm$ 0.33 |
| <b><i>p</i>-value</b> | <b>n.s.</b>       | <b>n.s.</b>     | <b>n.s.</b>     | <b>n.s.</b>     | <b>**</b>                    | <b>n.s.</b>     | <b>n.s.</b>     | <b>n.s.</b>     | <b>n.s.</b>            | <b>n.s.</b>     |

Results are expressed as means  $\pm$  standard errors. Different superscript lowercase letters in a column represent statistically significant differences between mean values for each main effect at  $p < 0.05$  obtained by ANOVA main effects and Tukey's test. Significance: \*\*\*— $p < 0.001$ . \*\*— $p < 0.01$ . \*— $p < 0.05$ .
